# Supplementary material
Source: PubMed Central journal article supplement (PMC2975227)
Supplement: supp_M110.110189_Supplementary_material.pdf [file supp_M110.110189_Supplementary_material.pdf]

## Supplemental Material

fig 1

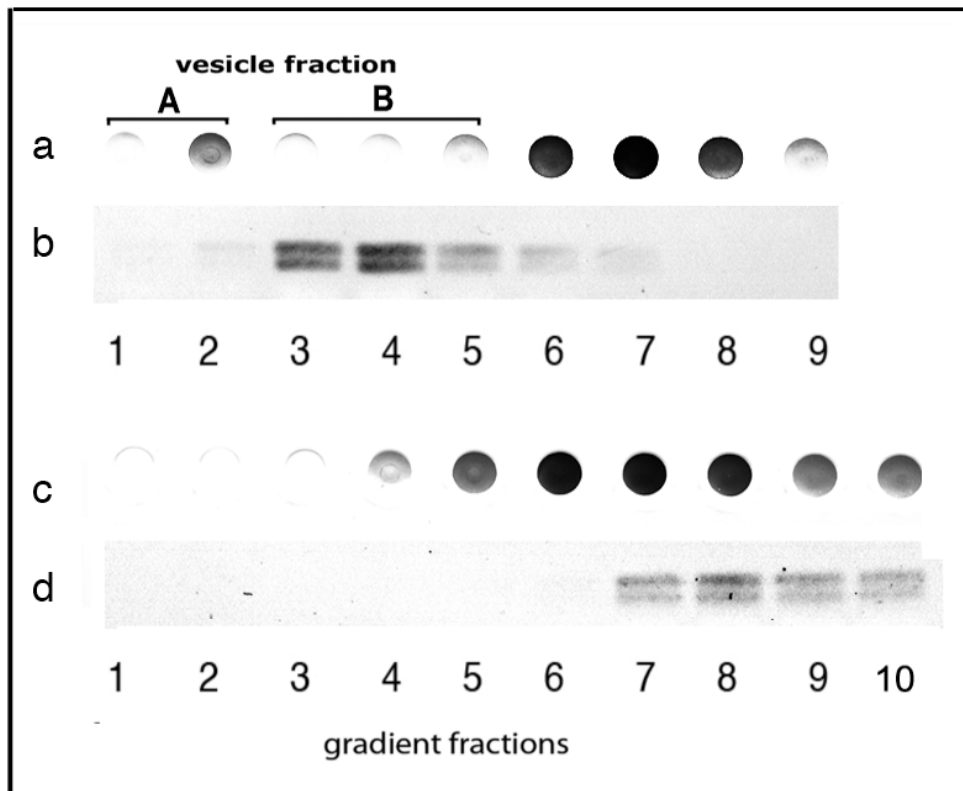

**Effect of temperature and detergent on gradient separation of VT1 binding vero cell derived vesicles.** a) VT1 binding to vero cell DRM vesicle fractions separated by sucrose gradient centrifugation at 37°C (1), b) Gb<sub>3</sub> content of gradient fraction GSL extract determined by VT1/TLC overlay ; c) VT1 binding to vero cell membrane vesicles prepared by shear force(2) rather than detergent resistance, d) Gb<sub>3</sub> content of gradient fraction GSL extract determined by VT1/TLC overlay. The discord between VT1 vesicle binding and Gb<sub>3</sub> vesicle content is maintained at physiological temperature. VT1 bound only to the lighter vesicle fraction A, while Gb<sub>3</sub> is most prevalent in VT1-unbound vesicle fraction B, when DRM vesicles were separated at 37°C rather than 4°C (a,b). **Detergent soluble Gb<sub>3</sub> would explain VT1 binding to the more dense, unresolved fractions at the bottom of the gradient.** In the absence of detergent (c,d), GSL containing gradient fractions were less well resolved in the gradient, but the discord between VT1 vesicle binding and Gb<sub>3</sub> vesicle content was maintained since VT1 bound fractions (5,6) containing little Gb<sub>3</sub>. **Thus this discord is not detergent induced.**

Supplementary Table 1

**Fatty acid content of Gb<sub>3</sub> within sucrose gradient separated vero cell derived vesicles determined by HPLC/tandem mass spectrometry.**

| Gb <sub>3</sub> fatty acid | Control vero cells<br>(% total Gb <sub>3</sub> in fraction) |                    | MCD treated vero cells<br>(% total Gb <sub>3</sub> in fraction) |                    | Vero cells<br>membrane<br>Gb <sub>3</sub> |
|----------------------------|-------------------------------------------------------------|--------------------|-----------------------------------------------------------------|--------------------|-------------------------------------------|
|                            | Vesicle fraction A                                          | Vesicle fraction B | Vesicle fraction A                                              | Vesicle fraction B |                                           |
| C24:0                      | 33.8                                                        | 31.1               | 37.2                                                            | 30.5               | 30.4                                      |
| C24:1                      | 23.0                                                        | 29.4               | 22.7                                                            | 26.0               | 36.2                                      |
| C22:0                      | 20.8                                                        | 19.9               | 17.2                                                            | 17.1               | 9.0                                       |
| C22:1                      | 4.3                                                         | 5.1                | 1.9                                                             | 4.8                | 4.3                                       |
| C20:0                      | 1.2                                                         | 1.4                | 2.0                                                             | 0.8                | 0.5                                       |
| C18:0                      | 2.6                                                         | 3.9                | 6.0                                                             | 6.0                | 3.5                                       |
| C16:0                      | 14.2                                                        | 8.5                | 11.8                                                            | 13.3               | 15.5                                      |

Gb<sub>3</sub> within vesicle fraction A is bound by VT1 whereas vesicle B Gb<sub>3</sub> is refractory. VT1 vesicle B binding is increased after MCD cholesterol extraction. The Gb<sub>3</sub> fatty acid content is similar for fraction A and B vesicles with C24 predominating. The ratio of C24:1/C24:0 is higher in vesicle fraction B. MCD does not affect the fatty acid distribution profile.

Method: N-Palmitoyl-D3-lactosylceramide was used as an internal standard. Samples, calibrator or QC were extracted with 3 mL of chloroform/methanol, 2:1 (v/v). The sample was re-dissolved in methanol and analysed by LC-MS/MS. The chromatographic separation was achieved isocratically with methanol on an Agilent Eclipse XDB C8 column. Electrospray ionisation was conducted in positive mode on a Quattro Ultima mass spectrometer equipped with a Z-Spray ion source. Individual Gb<sub>3</sub> isoforms and the internal standard were detected using the multiple reaction monitoring (MRM) function.

Although the VT1 binding Gb<sub>3</sub> fraction(fraction A) can be separated from the bulk Gb<sub>3</sub> containing vesicles (fraction B) under our conditions, these vesicles colocalize with the bulk GSL containing fractions in the larger scale sucrose gradient separation of DRMs (i.e. in 'fraction 5') used previously(3, 4). Centrifugation efficiency is an inverse function of the k factor =  $2.53 \times 10^5 \times \ln(r_{\max}/r_{\min}) / (\text{rpm}/1000)^2$

([www.beckmancoulter.com/literature/Bioresearch/0828\(DS\).pdf](http://www.beckmancoulter.com/literature/Bioresearch/0828(DS).pdf)). For constant  $r_{\min}$ ,  $k$  increases with tube length, explaining the increased resolution we observed.

#### references

1. Chen, X., Jen, A., Warley, A., Lawrence, M. J., Quinn, P. J., and Morris, R. J. (2009) Isolation at physiological temperature of detergent-resistant membranes with properties expected of lipid rafts: the influence of buffer composition, *Biochem J* 417, 525-533.
2. Macdonald, J. L., and Pike, L. J. (2005) A simplified method for the preparation of detergent-free lipid rafts, *J Lipid Res* 46, 1061-1067.
3. Nutikka, A., and Lingwood, C. (2004) Generation of receptor active, globotriaosyl ceramide/cholesterol lipid 'rafts' in vitro: a new assay to define factors affecting glycosphingolipid receptor activity., *Glycoconj. J.* 20, 22-38.
4. Tam, P., Mahfoud, R., Nutikka, A., Khine, A., Binnington, B., Paroutis, P., and Lingwood, C. (2008) Differential Intracellular Trafficking and Binding of Verotoxin 1 and Verotoxin 2 to Globotriaosylceramide-containing Lipid Assemblies, *J Cell Physiol* 216, 750-763.
